# Supplementary material
Source: Research Square preprint supplement (doi:10.21203/rs.3.rs-9633488/v1)
Supplement: Supplementary file 2 [file 2566600f56e48b565f3bc2d8.doc]

**TITLE: COVID 19 and sex work: Experiences of young women selling sex (16-19) during first and second wave in Beitbridge, Zimbabwe**

Researcher: Lyton Mafuva [BSSC]

Phone: +263 773063469

**What you should know about this research study**

- We are giving you this information sheet to inform you about the purpose, risks, and benefits of this research study.
- We cannot promise that this research will benefit you. The main goal of research studies is to gain knowledge that may help other people in the future.

- You have the right to refuse to take part or agree to take part now and change your mind later.
- Please read the information in the consent form and ask any questions before you make a decision.
- Your choice to participate is voluntary.

**PURPOSE**

COVID-19 pandemic is a serious threat to peoples’ livelihood. In countries such as Zimbabwe, little is known about the impact of the pandemic and the experiences of people in coping up with the containment measures being implemented. It is also not known how feasible and successful these measures for instance lockdowns, curfews, movement restrictions and their impact on young sex workers. We would like to invite you to be part of this study as a Key Informant and an outreach worker who can share with us your experiences and opinions on the experiences of young sex workers in the first and second wave of COVID 19.

The study will be carried out in Beitbridge. The researcher is a student studying towards Master of Science in Child Sensitive Social Policy with Women’s University in Africa.

**PROCEDURES AND DURATION**

The interview will take place in person and should take no longer than thirty minutes. Using open-ended questionnaire, you will be asked questions around the experiences of young sex workers during COVID 19 containment measures and how they managed to cope up with these measures.

**RISKS AND DISCOMFORTS**

There is no risk to being involved in the study. No one’s name or the organization that you work for will be used in the study.

**BENEFITS AND/OR COMPENSATION**

There is no direct benefit to you by taking part in the study however the information provided may help form new policies. Taking part in the study will not cost you anything. In case of other infectious diseases or a third wave, this information will help government and organizations to plan and mitigate effects of measures.

**CONFIDENTIALITY**

All information obtained will be stored anonymously in safe computer files. The computer will be password protected. No one will be able to access the information except for the researcher and supervisor. No one will be able to identify you from the information we collect.

**VOLUNTARY PARTICIPATION**

Participation in this study is voluntary. If you decide not to participate in this study, your decision will not affect your relations with your organization. You are free to withdraw your consent at any time.

**WHO TO CONTACT WITH QUESTIONS OR PROBLEMS?**

If you would like more information or have any questions about the COVID-19 study please contact Mr. Lyton Mafuva, The Researcher: 0773 063 469

**AUTHORIZATION**

YOU ARE MAKING A DECISION WHETHER OR NOT TO PARTICIPATE IN THIS STUDY. BY SAYING YES TO THE ANSWERS BELOW YOU ARE INDICATING THAT YOU UNDERSTAND THE INFORMATION PROVIDED, HAVE HAD ALL YOUR QUESTIONS ANSWERED, AND HAVE DECIDED TO PARTICIPATE.

**Before you agree, please ask any questions on any aspect of this study that is unclear to you. You may take as much time as necessary to think it over.**

- I have understood the information concerning this research that was read out to me in person and I understand what will be required of me.
- I understand that at any time I may withdraw from this research without giving a reason and without affecting my relationship with the researcher.

I agree for to participate in this study YES  NO 

**Consent from participant:**

Name (Print) Date

Name of Researcher (Print) Signature of Researcher Date

**We will keep a copy of this consent form on our files.**
